# Supplementary material for: Improvement of the rate capability of all-solid-state cells with Fe-based polysulfide positive electrode materials by modifying the microstructure
Source: Royal Society of Chemistry journal article supplement (doi:10.1039/d3ra08641k), 2024-01-01
Supplement: d3ra08641k1.pdf [file d3ra08641k1.pdf]

*Electronic Supplementary Information (ESI)*

# Improvement of Rate Capability of All-Solid-State Cells with Fe-Based Polysulfide Positive Electrode Materials by Modifying Microstructure

*Tomonari Takeuchi,<sup>a\*</sup> Noboru Taguchi,<sup>a</sup> Mitsunori Kitta,<sup>a</sup> Toyonari Yaji,<sup>b</sup>*

*Misae Otoyama,<sup>a</sup> Kentaro Kuratani,<sup>a</sup> and Hikari Sakaebe<sup>a,c</sup>*

<sup>a</sup> National Institute of Advanced Industrial Science and Technology (AIST)

Midorigaoka 1-8-31, Ikeda, Osaka 563-8577, Japan

<sup>b</sup> Synchrotron Radiation Center, Ritsumeikan University

Kusatsu, Shiga 525-8577, Japan

<sup>c</sup> Present address: Kyushu University, 6-1 Kasuga koen, Kasuga-shi, Fukuoka 816-8580,

Japan

## XANES spectra

Figure S1 shows the S K-edge X-ray absorption near-edge structure (XANES) spectra for the  $\text{Li}_8\text{FeS}_5\text{-Li}_2\text{FeS}_2$  and  $\text{Li}_8\text{FeS}_5\text{-H}$  samples.

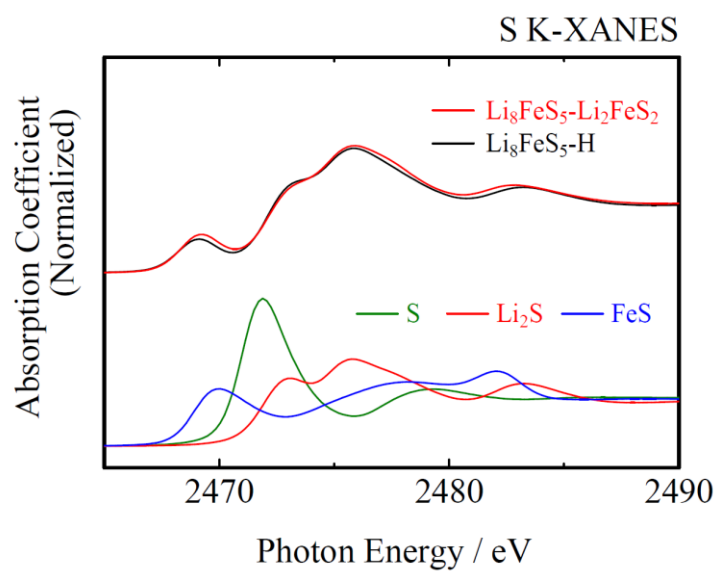

**Figure S1** S K-edge XANES spectra for the  $\text{Li}_8\text{FeS}_5\text{-H}$  and  $\text{Li}_8\text{FeS}_5\text{-Li}_2\text{FeS}_2$  samples.  $\text{Li}_2\text{S}$ , S, and FeS were used as references.
